# Supplementary material for: The Three Cs of Disclosing Serious Mental Illness at Work: Control, Conditions, Costs
Source: Atypon-hosted journal article supplement (doi:10.1176/appi.ps.202000160), 2021-01-20
Supplement: appi.ps.202000160.ds001.pdf [file appi.ps.202000160.ds001.pdf]

**Factors that influence the three dimensions of disclosure**

|                                                                                                                                                                                                                                                                                                                                                                                                                                                                                                                                                                                                                                                                                                                                                                                                                                                                                                                                                         |
|---------------------------------------------------------------------------------------------------------------------------------------------------------------------------------------------------------------------------------------------------------------------------------------------------------------------------------------------------------------------------------------------------------------------------------------------------------------------------------------------------------------------------------------------------------------------------------------------------------------------------------------------------------------------------------------------------------------------------------------------------------------------------------------------------------------------------------------------------------------------------------------------------------------------------------------------------------|
| <b>Control</b> <i>Whether or not disclosure is a voluntary choice</i>                                                                                                                                                                                                                                                                                                                                                                                                                                                                                                                                                                                                                                                                                                                                                                                                                                                                                   |
| <p>Factors that influence a worker’s control of the disclosure decision:</p> <ul style="list-style-type: none"> <li>• <i>Residual symptoms</i> - Degree to which the acute symptoms of serious mental illness are observable to others, making concealment of mental illness difficult or impossible</li> <li>• <i>Job compatibility</i> - Degree to which a worker is able to perform the essential functions of their job, without the need for employer-provided job accommodations</li> </ul>                                                                                                                                                                                                                                                                                                                                                                                                                                                       |
| <b>Conditions</b> <i>How much to disclose, to whom, and when</i>                                                                                                                                                                                                                                                                                                                                                                                                                                                                                                                                                                                                                                                                                                                                                                                                                                                                                        |
| <p>Internal factors that influence the conditions imposed:</p> <ul style="list-style-type: none"> <li>• <i>Individual preferences</i> - Personal beliefs regarding the importance of honesty, privacy, advocacy for persons with mental illness, the right to make one's own choices</li> <li>• <i>Internalized stigma</i> - Degree to which a worker accepts the negative stereotypes of mental illness as accurate and/or applying to them</li> </ul> <p>External factors that influence the conditions imposed;</p> <ul style="list-style-type: none"> <li>• <i>Social support</i> - Emotional and/or material resources provided to a worker with mental illness by members of their social network (i.e. family members, relatives, friends)</li> <li>• <i>Legal rights</i> - Degree to which a worker with mental illness is aware of the employment protections of the ADAAA</li> </ul>                                                          |
| <b>Costs</b> <i>Potential negative consequences of disclosure</i>                                                                                                                                                                                                                                                                                                                                                                                                                                                                                                                                                                                                                                                                                                                                                                                                                                                                                       |
| <p>Individual factors that influence workers’ perceptions of the consequences of disclosure:</p> <ul style="list-style-type: none"> <li>• <i>Diagnosis</i> - Worker’s DSM-V diagnosis of serious mental illness</li> <li>• <i>Experienced discrimination</i> - Degree to which a worker has previously experienced stigma or negative repercussions of mental illness, at work or in other settings</li> </ul> <p>Work-related factors that influence workers’ perceptions of the consequences of disclosure</p> <ul style="list-style-type: none"> <li>• <i>Job security</i> - Degree to which a worker’s job is protected by seniority, union contracts, or the possession of knowledge, skills, abilities that are difficult to replace</li> <li>• <i>Workplace culture</i> - Norms of the work environment regarding willingness of employees to disclose personal issues; management of sensitive information; tolerance of differences</li> </ul> |
